# Supplementary material
Source: PubMed Central journal article supplement (PMC4018934)
Supplement: AEM.00323-14_zam999105334so1.pdf [file AEM.00323-14_zam999105334so1.pdf]

Supplementary material for: *In vivo* self-assembly of stable GFP fusion protein particles and their uses in enzyme immobilization.

Mark Venning-Slater, David O. Hooks, Bernd H. A. Rehm

Institute of Fundamental Sciences, Massey University, Private Bag 11222, Palmerston North,

New Zealand; telephone: +64-6-350-5515, ext. 7890; fax: +64-6-350-2267; e-mail:

b.rehm@massey.ac.nz.

**Table S1:** Bacterial strains, plasmids, and primers used in this study.

| <i>Name</i>                                     | <i>Characteristics</i>                                                                                                                                       | <i>Source</i>             |
|-------------------------------------------------|--------------------------------------------------------------------------------------------------------------------------------------------------------------|---------------------------|
| <b><u>Bacterial strains</u></b>                 |                                                                                                                                                              |                           |
| XLI-Blue                                        | <i>recA1, endA1, gyrA96, thi-1, hsdR17(r<sub>k</sub>, m<sub>k</sub>), supE44, relA1, -, lac[F', proAB, lacI<sup>s</sup>, lacZΔM15, Tn10(Tc<sup>r</sup>)]</i> | Stratagene                |
| BL21(DE3)                                       | F <sup>-</sup> , <i>ompT, hsdS<sub>B</sub> (r<sub>B</sub><sup>-</sup> m<sub>B</sub><sup>-</sup>), gal, dcm</i> (DE3)                                         | Novagen                   |
| <b><u>Plasmids</u></b>                          |                                                                                                                                                              |                           |
| pMCS69                                          | pBBR1MCS derivative containing genes <i>phaA</i> and <i>phaB</i> of <i>R. eutropha</i> colinear to lac promoter, Cp <sup>R</sup>                             | (Amara & Rehm, 2003)      |
| pUC57:nanA                                      | Ap <sup>r</sup> , containing <i>nanA</i> on the pUC57 plasmid                                                                                                | Genscript Corporation     |
| pET14b                                          | Ap <sup>r</sup> , T7 promoter                                                                                                                                | Novagen                   |
| pET14b-nanA-phaC                                | pET14b vector containing <i>nanA</i> at the 3' end of <i>phaC</i>                                                                                            | (Hooks et al., 2013)      |
| pET14b-ext(AVTS)gfp-phaC(C319A)-linker-zz       | pET14b vector containing a gene fusion of ext(AVTS)gfp-phaC(C319A)-linker-zz                                                                                 | (Jahns et al., 2013)      |
| pET14b-ext(AVTS)gfp-phaC(C319A)-linker-nanA     | pET14b-ext(AVTS)gfp-phaC(C319A)-linker-zz derivative containing <i>nanA</i> fragment from pGEM-nanA at the 3' end                                            | This study                |
| pET14b-ext(AVTS)gfp-phaC(C319A)-linker-bla(-ss) | pET14b-ext(AVTS)gfp-phaC(C319A)-linker-zz derivative containing <i>bla(-ss)</i> fragment from pGEM-bla(-ss) at the 3' end                                    | This study                |
| pET14b-ext(AVTS)gfp-phaC(C319A)-linker-opdA     | pET14b-ext(AVTS)gfp-phaC(C319A)-linker-zz derivative containing <i>opdA</i> fragment from pET14b-phaC-linker-opdA at the 3' end                              | This study                |
| pET14b-ext(AVTS)gfp-nanA-linker-zz              | pET14b-ext(AVTS)gfp-phaC-linker-zz derivative containing <i>nanA</i> in the <i>NdeI</i> site                                                                 | This study                |
| pET14b-ext(AVTS)gfp-nanA-linker-nanA            | pET14b-ext(AVTS)gfp-nanA-linker-zz derivative containing <i>nanA</i> fragment from pGEM-nanA at the 3' end                                                   | This study                |
| pET14b-bla(-ss)-phaC                            | pET14b vector containing a gene fusion of <i>bla(-ss)-phaC</i> without the signal sequence encoding region                                                   | (Rasiah & Rehm, 2009)     |
| pET14b-phaC-linker-opdA                         | pET14b vector containing a gene fusion of <i>phaC-linker-opdA</i>                                                                                            | (Blatchford et al., 2012) |
| <b><u>Primers</u></b>                           |                                                                                                                                                              |                           |
| Bla(-ss)-Fwd                                    | ATA ATA CTC GAG ATG GCC GCT AAC CTG AAC GG                                                                                                                   | IDT                       |
| Bla(-ss)-Rev                                    | AAT AAT GGA TCC TTA GCC ACC ACC ACC ACC GC                                                                                                                   | IDT                       |

## MALDI-TOF protein identification

**Table S2:** Tryptic peptides of GFP fusion proteins as identified by MALDI-TOF MS

Total bead protein was electrophoresed onto a gel and a band corresponding to the theoretical molecular weight of the fusion protein was isolated and analysed by mass spectrometry.

| <b>Fusion Protein<br/>(coverage)</b> | <b>Identified peptides (modifications)</b>                                                                                                                                                                                                                                                                                                                                                        |
|--------------------------------------|---------------------------------------------------------------------------------------------------------------------------------------------------------------------------------------------------------------------------------------------------------------------------------------------------------------------------------------------------------------------------------------------------|
| GFP-iPhaC-L-NanA<br>(27%)            | F32-K46, S91-R101, F119-R127, V269-R284, I311-R322, F363-R373, A374-K387, F394-R417, L418-R428, I443-R455, Y498-R511, H512-R526, N527-R547 (carbamidomethyl), E619-R634 (carbamidomethyl), L704-R726 (carbamidomethyl), E727-K746, F749-K766, A812-R821, G862-K879, T1112-R1126 (carbamidomethyl, oxidation), A1142-R1151 (oxidation)                                                             |
| GFP-NanA-L-NanA<br>(28%)             | F32-K46, S91-R101, F119-R127, H174-K214, D221-K243 (oxidation), L278-R307, A372-K394, L395-K413, Q414-R426, T505-R519 (carbamidomethyl), K520-K528, A535-R544, G545-R556, G557-R569                                                                                                                                                                                                               |
| GFP-iPhaC-L-Bla<br>(38%)             | G8-K30, L145-K160, V268-R283, I310-R321, D325-K337, F362-R372, F393-R416, I442-R454, N455-K481, Y497-R510, H511-R525, N526-R546, E618-R633 (carbamidomethyl), G634-K660, L703-R725 (carbamidomethyl), E726-K745, F748-K765, A811-R820, L881-K903, G904-K926, W1011-R1025, W1071-K1090, D1099-R1105, T1133-R1161 (two deamidated), E1211-K1226, K1248-R1269, Q1249-R1269, Q1299-R1312, S1313-R1339 |
| GFP-iPhaC-L-OpdA<br>(39%)            | G8-K30, L145-K160, D220-K242 V268-R283, F362-R372, F393-R416, L417-R427, I442-R454, N455-K481, Y497-R510, H511-R525, N526-R546, E618-R633 (carbamidomethyl), L703-R725 (carbamidomethyl), E726-K745, A811-R820, G871-R896 (carbamidomethyl), A897-R905, A921-R937, A948-R968, S971-R981, A1005-K1014, D1037-R1054, V1055-R1075 (carbamidomethyl), M1084-R1104, I1149-R1160, G1169-R1185           |

**Table S3:** Long-term enzyme particle stability results.

Enzymes activities after storage for NanA and Bla enzymes are expressed as percentages of initial activity, while those of OpdA are in the original absorbance units. Storage periods are in brackets (days). n.d. = not detected, n.a. = not assayed,  $t_0$  = initial production level before storage.

|                |                | Production level of Neu5AC (NanA), maltose (BLA), or <i>para</i> -nitrophenol (OpdA) after storage |                              |                               |                               |
|----------------|----------------|----------------------------------------------------------------------------------------------------|------------------------------|-------------------------------|-------------------------------|
|                |                | Temperature                                                                                        |                              |                               |                               |
| Fusion protein | $t_0$          | 37 °C                                                                                              | RT                           | 4 °C                          | -80 °C                        |
| GiCLN          | 50.6 ± 1.9     | n.a.                                                                                               | n.d. <sup>(97)</sup>         | 45.1 <sup>(97)</sup>          | 48.4 <sup>(97)</sup>          |
| NanA-PhaC      | 163.2 ± 1.9    | n.a.                                                                                               | 3.2 <sup>(97)</sup>          | 74.4 <sup>(97)</sup>          | 77.1 <sup>(97)</sup>          |
| GiCLB          | 0.96 ± 0.04    | n.a.                                                                                               | 91.7 <sup>(95)</sup>         | 104.1 <sup>(95)</sup>         | 93.8 <sup>(69)</sup>          |
| Bla(-ss)-PhaC  | 2.08 ± 0.01    | n.a.                                                                                               | 65.9 <sup>(95)</sup>         | 98.6 <sup>(95)</sup>          | 99.5 <sup>(69)</sup>          |
| GiCLO          | n.a.           | n.a.                                                                                               | 0.52 ± 0.01 <sup>(132)</sup> | 0.58 ± 0.01 <sup>(132)</sup>  | 0.65 ± 0.01 <sup>(132)</sup>  |
| PhaC-OpdA      | n.a.           | n.a.                                                                                               | n.a.                         | 1.01 ± 0.01 <sup>(133)</sup>  | n.a.                          |
| GiCLO (2)      | 0.258 ± 0.002* | 0.159 ± 0.003 <sup>(30)</sup>                                                                      | n.a.                         | 0.166 <sup>(30)</sup>         | 0.166 <sup>(30)</sup>         |
| PhaC-OpdA (2)  | 0.247 ± 0.005* | n.d.                                                                                               | n.a.                         | 0.157 ± 0.005 <sup>(30)</sup> | 0.160 ± 0.002 <sup>(30)</sup> |

\*Measured in a separate assay to the storage results meaning initial substrate concentration could vary and are therefore not directly comparable, see Materials and Methods.

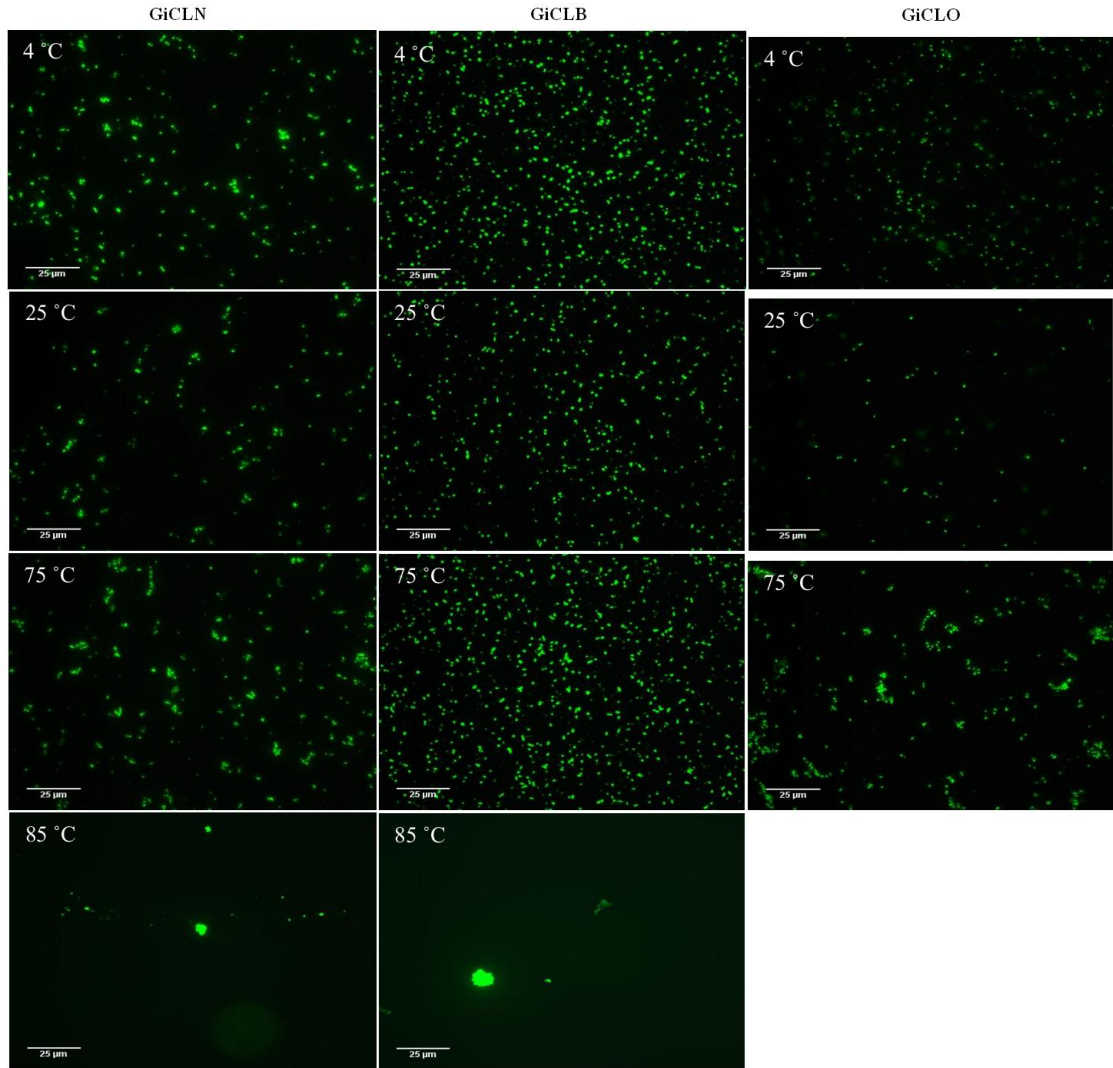

Figure S1: Fluorescent images of GFP particles after temperature treatment at 4 °C, 25 °C, 75 °C, and 85 °C were obtained at 1000x magnification using a U-MWIBA2 Blue excitation filter cube fitted to an Olympus BX51 Fluorescent Light Microscope (Olympus Optical Co., Japan), an Optronics camera (Optronics, USA), and MagnaFire™ 2.1C Application software (Optronics, USA). GiCLN: GFP-iPhaC-L-NanA, GiCLB: GFP-iPhaC-L-Bla, GiCLO: GFP-iPhaC-L-OpdA.

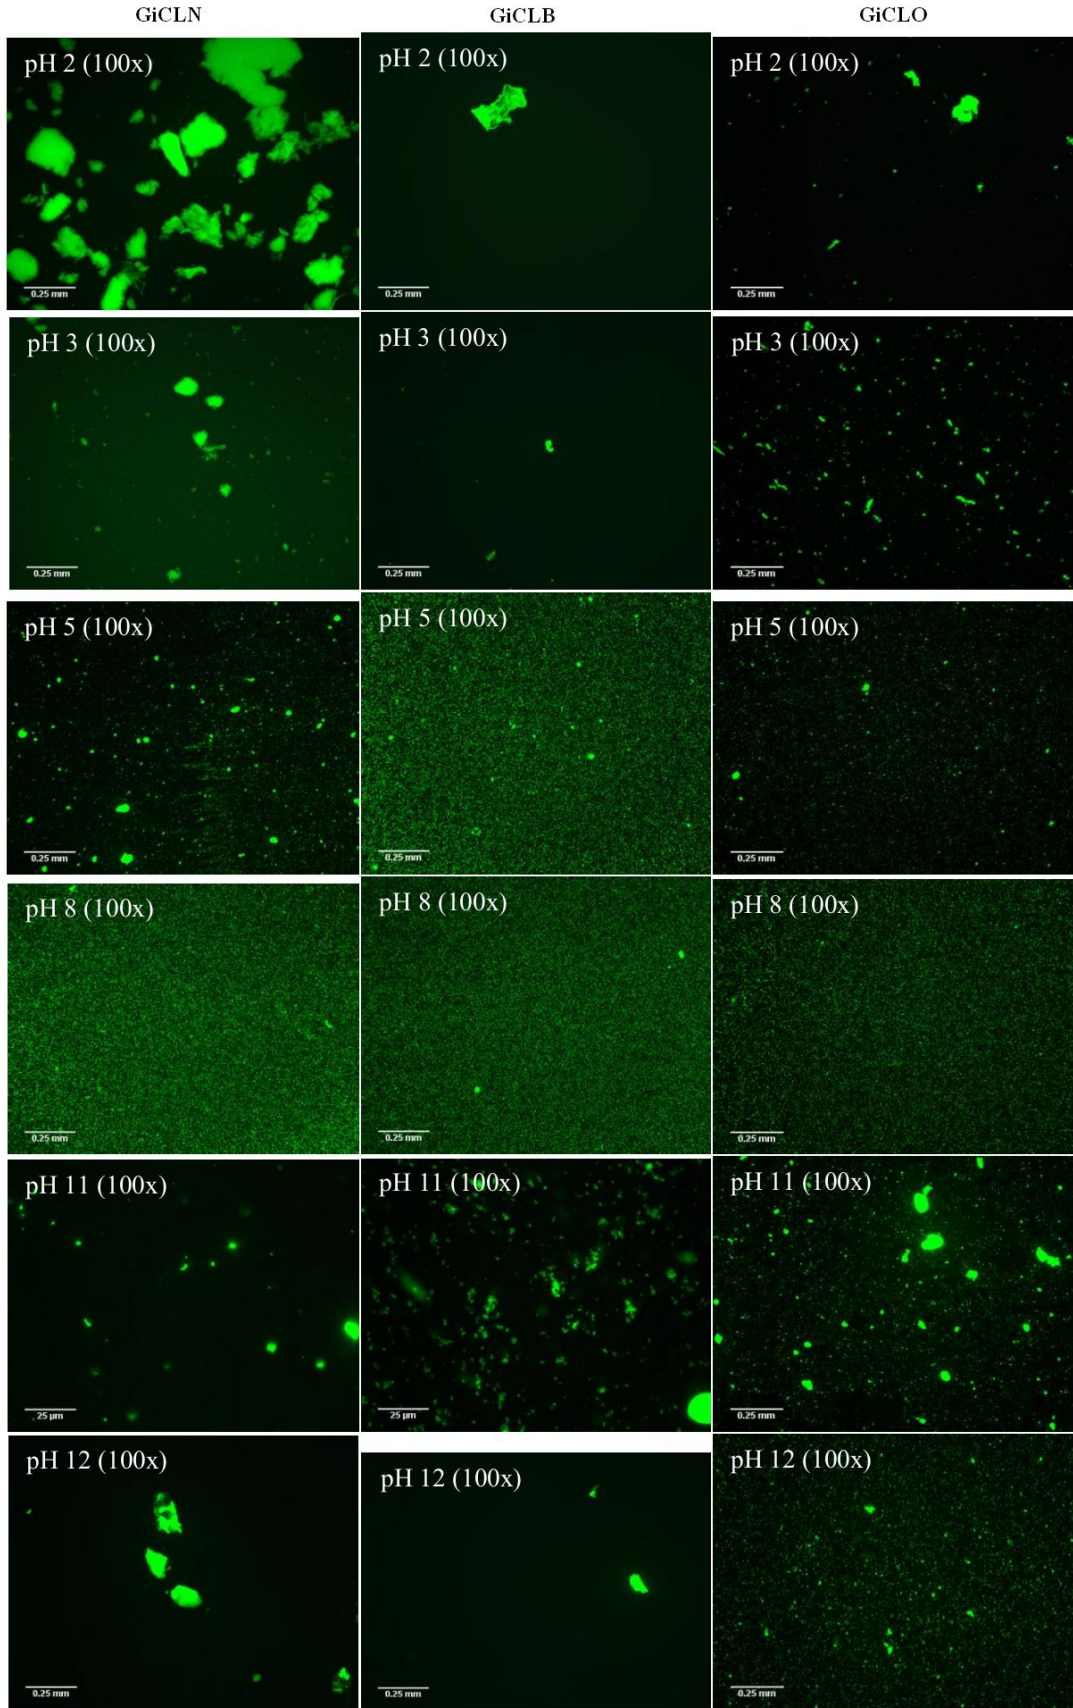

Figure S2: Fluorescent images of GFP particles after 10 min pH treatment at 2, 3, 5, 8, 11, and 12 were obtained at 100x magnification using a U-MWIBA2 Blue excitation filter cube fitted to an Olympus BX51 Fluorescent Light Microscope (Olympus Optical Co., Japan), an Optronics camera (Optronics, USA), and MagnaFire™ 2.1C Application software (Optronics, USA). GiCLN: GFP-iPhaC-L-NanA, GiCLB: GFP-iPhaC-L-Bla, GiCLO: GFP-iPhaC-L-OpdA.

## References

1. Amara, A., Rehm, B. H.A (2003) Replacement of the catalytic nucleophile cysteine-296 by serine in class II polyhydroxyalkanoate synthase from *Pseudomonas aeruginosa* mediated synthesis of a new polyoxoester: Identification of catalytic residues. *Biochem. J.* 374:413-421.
2. Hooks, D.O., Blatchford, P.A., Rehm, B.H.A. (2013) Bioengineering of bacterial polymer inclusions catalyzing the synthesis of N-acetyl neuraminic acid. *Appl. Environ. Microbiol.* 79:3116-21.
3. Jahns, A.C., Maspolim, Y., Chen, S., Guthrie, J.M., Blackwell, L.F., Rehm, B.H.A. (2013) In vivo self-assembly of fluorescent protein microparticles displaying specific binding domains. *Bioconjug. Chem.* 24 (8), 1314-1323.
4. Rasiah, I, Rehm, B.H.A. (2009) One-step production of immobilised  $\alpha$ -amylase in recombinant *Escherichia coli*. *Appl. Environ. Microbiol.* 75: 2012–2016.
5. Blatchford, P.A., Scott, C., French, N., Rehm, B.H.A. (2012) Immobilization of organophosphohydrolase OpdA from *Agrobacterium radiobacter* by overproduction at the surface of polyester inclusions inside engineered *Escherichia coli*. *Biotech. Bioeng.* 109:1101-1108.
